# Supplementary material for: Can Essential Oils Be a Natural Alternative for the Control of Spodoptera frugiperda? A Review of Toxicity Methods and Their Modes of Action
Source: MDPI journal article supplement (doi:10.3390/plants12010003), 2022-12-20
Supplement: s1 [file s1]

## Supplementary Material S1

**Table S1** *Spodoptera* pest species on which the toxicity of EOs was evaluated

| Spodoptera species   | Occurrence in the literature |
|----------------------|------------------------------|
| <i>S. littoralis</i> | 109                          |
| <i>S. litura</i>     | 81                           |
| <i>S. exigua</i>     | 18                           |

**Table S2** Methods used in *S. littoralis*, *S. litura* and *S. exigua* to assess the toxicity of EOs

| Toxicity methods      | Occurrence in the literature |
|-----------------------|------------------------------|
| Topical application   | 123                          |
| Fumigant              | 47                           |
| Toxicity by ingestion | 41                           |
| nd                    | 1                            |

nd: non determined.

**Table S3** Times at which the mortality of *S. littoralis*, *S. litura* and *S. exigua* was recorded.

| Time  | Occurrence in the literature |
|-------|------------------------------|
| 24 h  | 146                          |
| 72 h  | 27                           |
| 48 h  | 17                           |
| 96 h  | 4                            |
| nd    | 3                            |
| 12 h  | 1                            |
| 120 h | 1                            |
| 168 h | 1                            |

nd: non determined.

**Table S4** Larval stages of *S. littoralis*, *S. litura* and *S. exigua* used to assess the toxicity of EOs.

| Larval stage | Occurrence in the literature |
|--------------|------------------------------|
| 3            | 175                          |
| 2            | 20                           |
| 4            | 10                           |
| 1            | 1                            |
| 5            | 1                            |

**Table S5** Families whose essential oil has been studied as an insecticide against *S. littoralis*, *S. litura* and *S. exigua*.

| Plant family      | Occurrence in the literature |
|-------------------|------------------------------|
| Lamiaceae         | 89                           |
| Apiaceae          | 30                           |
| Zingiberaceae     | 19                           |
| Rutaceae          | 16                           |
| Araceae           | 11                           |
| Cupressaceae      | 9                            |
| Myrtaceae         | 9                            |
| Asteraceae        | 9                            |
| Verbenaceae       | 6                            |
| Pinaceae          | 6                            |
| Lauraceae         | 5                            |
| Poaceae           | 4                            |
| Annonaceae        | 3                            |
| Myoporaceae       | 2                            |
| Illiciaceae       | 1                            |
| Valerianaceae     | 1                            |
| Geraneacea        | 1                            |
| Cardiopteridaceae | 1                            |
| Burseraceae       | 1                            |
| Santalaceae       | 1                            |
| Cannabaceae       | 1                            |
| Amaryllidaceae    | 1                            |

**Table S6** Plant species whose Essential oils are evaluated as insecticides against *S. littoralis*, *S. litura* and *S. exigua*.

| Plant specie                  | Occurrence in the literature |
|-------------------------------|------------------------------|
| <i>Foeniculum vulgare</i>     | 13                           |
| <i>Acorus calamus</i>         | 11                           |
| <i>Crithmum maritimum</i>     | 8                            |
| <i>Curcuma longa</i>          | 7                            |
| <i>Salvia officinalis</i>     | 7                            |
| <i>Alpinia pyramidata</i>     | 6                            |
| <i>Coleus amboinicus</i>      | 6                            |
| <i>Lantana camara</i>         | 6                            |
| <i>Lavandula latifolia</i>    | 5                            |
| <i>Origanum majorana</i>      | 5                            |
| <i>Pelargonium graveolens</i> | 5                            |
| <i>Lavandula angustifolia</i> | 4                            |
| <i>Mentha arvensis</i>        | 4                            |
| <i>Ocimum basilicum</i>       | 4                            |
| <i>Amyris balsamifera</i>     | 3                            |
| <i>Artemisia absinthium</i>   | 3                            |
| <i>Juniperus virginiana</i>   | 3                            |
| <i>Melissa officinalis</i>    | 3                            |

|                                  |   |
|----------------------------------|---|
| <i>Mentha spicata</i>            | 3 |
| <i>Pogostemon cablin</i>         | 3 |
| <i>Rosmarinus officinalis</i>    | 3 |
| <i>Zingiber officinale</i>       | 3 |
| <i>Abies siberica</i>            | 2 |
| <i>Citrus aurantifolia</i>       | 2 |
| <i>Citrus limonum</i>            | 2 |
| <i>Cymbopogon winterianus</i>    | 2 |
| <i>Eucalyptus globulus</i>       | 2 |
| <i>Eugenia caryophyllata</i>     | 2 |
| <i>Juniperus communis</i>        | 2 |
| <i>Melaleuca quinquenervia</i>   | 2 |
| <i>Mentha citrata</i>            | 2 |
| <i>Mentha pulegium</i>           | 2 |
| <i>Myoporum bontiodides</i>      | 2 |
| <i>Nepeta cataria</i>            | 2 |
| <i>Origanum compactum</i>        | 2 |
| <i>Origanum vulgare</i>          | 2 |
| <i>Pelargonium roseum</i>        | 2 |
| <i>Salvia sclarea</i>            | 2 |
| <i>Spheranthus amaranthroids</i> | 2 |
| <i>Tagetes bipinata</i>          | 2 |
| <i>Thuja occidentalis</i>        | 2 |
| <i>Thymus mastichina</i>         | 2 |
| <i>Thymus vulgaris</i>           | 2 |
| <i>Tsuga canadensis</i>          | 2 |
| <i>Aframomum citratum</i>        | 1 |
| <i>Allium sativum</i>            | 1 |
| <i>Alpinia galanga</i>           | 1 |
| <i>Angelica archangelica</i>     | 1 |
| <i>Artemisia nakaii</i>          | 1 |
| Basil <sup>a</sup>               | 1 |
| Bergamot <sup>a</sup>            | 1 |
| <i>Cannabis sativa</i>           | 1 |
| <i>Chloroxylon swietenia</i>     | 1 |
| <i>Cinnamomum verum</i>          | 1 |
| <i>Cinnamomum zeylanicum</i>     | 1 |
| Cinnamon <sup>a</sup>            | 1 |
| Citronella <sup>a</sup>          | 1 |
| <i>Citrus aurantium</i>          | 1 |
| <i>Citrus bergamia</i>           | 1 |
| <i>Citrus limon</i>              | 1 |
| Clary sage <sup>a</sup>          | 1 |
| Clove bud <sup>a</sup>           | 1 |
| <i>Coriandrum sativum</i>        | 1 |
| <i>Cuminum cyminum</i>           | 1 |
| <i>Cymbopogon nardus</i>         | 1 |
| <i>Cupressus sempervirens</i>    | 1 |

|                                    |   |
|------------------------------------|---|
| Cypress <sup>a</sup>               | 1 |
| <i>Daucus carota</i>               | 1 |
| <i>Eucalyptus radiata</i>          | 1 |
| Fennel <sup>a</sup>                | 1 |
| Fennel sweet <sup>a</sup>          | 1 |
| Frankincense <sup>a</sup>          | 1 |
| Geranium <sup>a</sup>              | 1 |
| <i>Hedychium coccineum</i>         | 1 |
| <i>Helosciadium nodiflorum</i>     | 1 |
| <i>Illicium verum</i>              | 1 |
| Lavander (Bulgariam) <sup>a</sup>  | 1 |
| Lavander (french) <sup>a</sup>     | 1 |
| Lemon <sup>a</sup>                 | 1 |
| Lemongrass <sup>a</sup>            | 1 |
| <i>Majorana hortensis</i>          | 1 |
| Mandarin <sup>a</sup>              | 1 |
| Marjoram <sup>a</sup>              | 1 |
| <i>Mentha aquatica</i>             | 1 |
| <i>Mentha longifolia</i>           | 1 |
| <i>Mentha x piperita</i>           | 1 |
| <i>Monodora myristica</i>          | 1 |
| <i>Ocimum tenuiflorum</i>          | 1 |
| <i>Ocimum gratissimum</i>          | 1 |
| Orange sweet <sup>a</sup>          | 1 |
| <i>Origanum creticum</i>           | 1 |
| <i>Origanum syriacum syriacum</i>  | 1 |
| Patchouli <sup>a</sup>             | 1 |
| Peppermint <sup>a</sup>            | 1 |
| <i>Pimpinella anisum</i>           | 1 |
| Pine <sup>a</sup>                  | 1 |
| <i>Ridolfia segetum</i>            | 1 |
| Rosemary <sup>a</sup>              | 1 |
| <i>Salvia hispanica</i>            | 1 |
| <i>Salvia veneris</i>              | 1 |
| Sandal wood <sup>a</sup>           | 1 |
| Spearmint <sup>a</sup>             | 1 |
| Sweet thyme <sup>a</sup>           | 1 |
| <i>Thymus serpyllum</i>            | 1 |
| <i>Valeriana jatamansi</i>         | 1 |
| <i>Xylopi aethiopica</i>           | 1 |
| ylang ylang                        | 1 |
| <i>Wedelia prostrata</i>           | 1 |
| <i>Zanthoxylum armatum</i>         | 1 |
| Camphor essential oil <sup>a</sup> | 1 |
| Castor essential oil <sup>a</sup>  | 1 |
| withe thyme                        | 1 |
| <i>Hyssopus officinalis</i>        | 1 |
| <i>Matricaria recutita</i>         | 1 |

|                            |   |
|----------------------------|---|
| <i>Syzygium aromaticum</i> | 1 |
| <i>Pinus mugo</i>          | 1 |
| <i>Cinnamomum verum</i>    | 1 |
| <i>Cinnamomum cassia</i>   | 1 |
| <i>Satureia hortensis</i>  | 1 |

---

<sup>a</sup>Commercial EOs. Plant species name not provided.

**Table S7** Lethal effects of EOs tested by the Topical application method in 3<sup>rd</sup> larval stage of *Spodoptera litura*, *S. littoralis* and *S. exigua*.

| Spodoptera species   | Essential oil                  | 50% Lethal Doses<br>(LD <sub>50</sub> ; µg/ insect) | Reference |
|----------------------|--------------------------------|-----------------------------------------------------|-----------|
| <i>S. exigua</i>     | <i>Rosmarinus officinalis</i>  | 5.85 x 10 <sup>-4*1</sup>                           | [160]     |
|                      | <i>Salvia hispanica</i>        | 18.4 <sup>2</sup>                                   | [110]     |
|                      | <i>Salvia hispanica</i>        | 24.8 <sup>1</sup>                                   | [110]     |
|                      | <i>Salvia veneris</i>          | 69 <sup>1</sup>                                     | [161]     |
|                      | <i>Citrus bergamia</i>         | 146.17* <sup>2</sup>                                | [160]     |
|                      | <i>Citrus aurantium</i>        | 276.74* <sup>2</sup>                                | [160]     |
|                      | <i>Amyris balsamifera</i>      | 334.78* <sup>1</sup>                                | [160]     |
|                      | <i>Cymbopogon winterianus</i>  | 533.44* <sup>1</sup>                                | [162]     |
| <i>S. littoralis</i> | <i>Nepeta cataria</i>          | 3.6 x 10 <sup>-5*1</sup>                            | [162]     |
|                      | <i>Lavandula latifolia</i>     | 5.4x 10 <sup>-5*1</sup>                             | [162]     |
|                      | <i>Mentha citrata</i>          | 3.7 x 10 <sup>-4*1</sup>                            | [162]     |
|                      | <i>Thymus mastichina</i>       | 5.13 x 10 <sup>-4*1</sup>                           | [162]     |
|                      | <i>Ocimum basilicum</i>        | 5.85 x 10 <sup>-4*1</sup>                           | [162]     |
|                      | <i>Lavandula angustifolia</i>  | 8.28 x 10 <sup>-4*1</sup>                           | [162]     |
|                      | <i>Eugenia caryophyllata</i>   | 29.3 <sup>1</sup>                                   | [162]     |
|                      | <i>Ocimum gratissimum</i>      | 30.2 <sup>1</sup>                                   | [163]     |
|                      | <i>Melaleuca quinquenervia</i> | 31.1 <sup>1</sup>                                   | [162]     |
|                      | <i>Ridolfia segetum</i>        | 37.9 <sup>1</sup>                                   | [164]     |
|                      | <i>Pimpinella anisum</i>       | 57.3 <sup>1</sup>                                   | [165]     |
|                      | <i>Mentha spicata</i>          | 58 <sup>1</sup>                                     | [162]     |
|                      | <i>Mentha pulegium</i>         | 63 <sup>1</sup>                                     | [162]     |
|                      | <i>Thymus vulgaris</i>         | 71 <sup>1</sup>                                     | [162]     |
|                      | <i>Pogostemon cablin</i>       | 78 <sup>1</sup>                                     | [162]     |
|                      | <i>Origanum vulgare</i>        | 82 <sup>1</sup>                                     | [162]     |
|                      | <i>Rosmarinus officinalis</i>  | 89 <sup>1</sup>                                     | [162]     |
|                      | <i>Salvia officinalis</i>      | 93 <sup>1</sup>                                     | [162]     |
|                      | <i>Origanum compactum</i>      | 96 <sup>1</sup>                                     | [162]     |
|                      | <i>Cuminum cyminum</i>         | 100 <sup>1</sup>                                    | [165]     |
|                      | <i>Origanum syriacum</i>       | 103.3 <sup>1</sup>                                  | [166]     |
|                      | <i>Helosciadium nodiflorum</i> | 116.7 <sup>1</sup>                                  | [167]     |
|                      | <i>Aframomum citratum</i>      | 119.2 <sup>1</sup>                                  | [168]     |
|                      | <i>Cannabis sativa</i>         | 152.3 <sup>1</sup>                                  | [169]     |
|                      | <i>Tsuga canadensis</i>        | 318.16 <sup>1</sup>                                 | [162]     |
|                      | <i>Abies siberica</i>          | 596.54 <sup>1</sup>                                 | [162]     |
| <i>S. litura</i>     | <i>Alpinia pyramidata</i>      | 13.26 <sup>1</sup>                                  | [170]     |
|                      | <i>Curcuma longa</i>           | 120.4 <sup>1</sup>                                  | [170]     |
|                      | <i>Coleus amboinicus</i>       | 123.6 <sup>1</sup>                                  | [170]     |
|                      | <i>Alpinia pyramidata</i>      | 130.4 <sup>1</sup>                                  | [170]     |
|                      | <i>Curcuma longa</i>           | 137.6 <sup>1</sup>                                  | [170]     |
|                      | <i>Alpinia pyramidata</i>      | 142.5 <sup>1</sup>                                  | [170]     |
|                      | <i>Curcuma longa</i>           | 168.6 <sup>1</sup>                                  | [170]     |
|                      | Basil <sup>a</sup>             | 242.7 <sup>1</sup>                                  | [171]     |
|                      | Lemongrass <sup>a</sup>        | 243.5 <sup>1</sup>                                  | [171]     |
|                      | Spearmint <sup>a</sup>         | 243.8 <sup>1</sup>                                  | [171]     |

---

|                                   |                    |       |
|-----------------------------------|--------------------|-------|
| Geranium <sup>a</sup>             | 247.1 <sup>1</sup> | [171] |
| Peppermint <sup>a</sup>           | 263.3 <sup>1</sup> | [171] |
| Clove bud <sup>a</sup>            | 266.2 <sup>1</sup> | [171] |
| Fennel sweet <sup>a</sup>         | 277.2 <sup>1</sup> | [171] |
| Patchouli <sup>a</sup>            | 289.1 <sup>1</sup> | [171] |
| sweet thyme <sup>a</sup>          | 307.6 <sup>1</sup> | [171] |
| Citronella <sup>a</sup>           | 398.1 <sup>1</sup> | [171] |
| Marjoram <sup>a</sup>             | 648.4 <sup>1</sup> | [171] |
| Frankincense <sup>a</sup>         | >1000 <sup>1</sup> | [171] |
| Lavander (Bulgarian) <sup>a</sup> | >1000 <sup>1</sup> | [171] |
| Rosemary <sup>a</sup>             | >1000 <sup>1</sup> | [171] |

---

All values marked with an asterisk (\*) were recalculated for comparison.

<sup>1</sup>Determined at 24 hs.

<sup>2</sup>Determined at 48 hs.

<sup>a</sup>Commercial EOs. Plant species name not provided.

**Table S8** *Spodoptera* pest species on which the toxicity of pure VOCs was evaluated

| Spodoptera species   | Occurrence in the literature |
|----------------------|------------------------------|
| <i>S. littoralis</i> | 58                           |
| <i>S. litura</i>     | 12                           |
| <i>S. exigua</i>     | 1                            |

**Table S9** Methods used in *S. littoralis*, *S. litura* and *S. exigua* to assess the toxicity of pure VOCs

| Toxicity methods      | Occurrence in the literature |
|-----------------------|------------------------------|
| Topical application   | 67                           |
| Toxicity by ingestion | 6                            |
| Fumigant              | 2                            |
| Immersion             | 2                            |
| nd                    | 1                            |

nd: non determined.

**Table S10** Times at which the mortality of *S. littoralis*, *S. litura* and *S. exigua* was recorded.

| Time | Occurrence in the literature |
|------|------------------------------|
| 24 h | 66                           |
| 48 h | 4                            |
| nd   | 3                            |
| 96 h | 2                            |
| 72 h | 1                            |

nd: non determined.

**Table S11** Larval stages of *S. littoralis*, *S. litura* and *S. exigua* used to assess the toxicity of pure VOCs

| Larval stage | Occurrence in the literature |
|--------------|------------------------------|
| 3            | 48                           |
| 4            | 25                           |
| 2            | 1                            |
| nd           | 1                            |

nd: non determined.

**Table S12** Pure VOCs used to evaluate toxicity against *S. littoralis*, *S. litura* and *S. exigua*

| Pure VOC        | Occurrence in the literature |
|-----------------|------------------------------|
| carvacrol       | 5                            |
| eugenol         | 4                            |
| limonene        | 4                            |
| thymol          | 4                            |
| $\beta$ -pinene | 3                            |
| (+)-camphor     | 3                            |
| 1,8-cineole     | 3                            |



|                          |   |
|--------------------------|---|
| $\gamma$ -terpinene      | 3 |
| linalool                 | 3 |
| p-cymene                 | 3 |
| (-)-camphene             | 3 |
| $\alpha$ -terpineol      | 3 |
| trans-anethole           | 3 |
| $\beta$ -caryophyllene   | 3 |
| pogostone                | 3 |
| gallic acid              | 2 |
| canillin                 | 2 |
| $\alpha$ -pinene         | 2 |
| (-)-borneol              | 2 |
| ( $\pm$ )-citronellal    | 2 |
| cinnamyl alcohol         | 2 |
| terpinen-4-ol            | 2 |
| 2,6-dimethoxyphenol      | 1 |
| 2-ethylphenol            | 1 |
| 2-methoxy-4-methylphenol | 1 |
| 4-allylanisole           | 1 |
| 4-ethylguaiacol          | 1 |
| 4-ethylphenol            | 1 |
| $\beta$ -citronellol     | 1 |
| caffeic acid             | 1 |
| cinnamaldehyde           | 1 |
| dimethyl sulfide         | 1 |
| estragole                | 1 |
| ferulic acid             | 1 |
| geijerene                | 1 |
| geraniol                 | 1 |
| guaiacol                 | 1 |
| isoeugenol               | 1 |
| L-carvone                | 1 |
| menthone                 | 1 |
| myrcene                  | 1 |
| p-coumaric acid          | 1 |
| phloroglucinol           | 1 |
| pregeijerene             | 1 |
| rotenone                 | 1 |
| sabinene                 | 1 |
| salicylaldehyde          | 1 |
| salicylic acid           | 1 |
| sinapic acid             | 1 |
| syringic acid            | 1 |
| terpinolene              | 1 |
| trans-cinnamic acid      | 1 |
| vanillic acid            | 1 |
| $\alpha$ -phellandrene   | 1 |
| 3-carene                 | 1 |

|                                   |   |
|-----------------------------------|---|
| $\alpha$ -thujone                 | 1 |
| (-)-bornyl acetate                | 1 |
| $\alpha$ -caryophyllene           | 1 |
| $\gamma$ -elemene                 | 1 |
| $\alpha$ -humulene                | 1 |
| (E,E)- $\alpha$ -farnesene        | 1 |
| 2,6-octadienal, 3,7-dimethyl-, (Z | 1 |
| eucalyptol                        | 1 |
| p-menth-1-en-8-ol                 | 1 |
| 1,6-octadien-3-ol, 3,7-dimethyl   | 1 |
| 1-cyclohexyl-2-buten-1-o          | 1 |
| pulegone                          | 1 |

---

**Table S13** Lethal effects of pure VOCs tested, on 3<sup>rd</sup> larval stage of *Spodoptera littura*, *S. littoralis* and *S. exigua*, by Topical application method.

| Spodoptera specie    | Compound            | 50% Lethal Doses<br>(LD <sub>50</sub> ; µg/ insect) | Reference |
|----------------------|---------------------|-----------------------------------------------------|-----------|
| <i>S. littoralis</i> | thymol              | 9 <sup>1</sup>                                      | [172]     |
|                      | γ-terpinene         | 11.86 <sup>1</sup>                                  | [173]     |
|                      | carvacrol           | 15 <sup>1</sup>                                     | [172]     |
|                      | terpinen-4-ol       | 16.2 <sup>1</sup>                                   | [173]     |
|                      | trans-anethole      | 18 <sup>1</sup>                                     | [172]     |
|                      | L-carvone           | 18 <sup>1</sup>                                     | [172]     |
|                      | menthone            | 25 <sup>1</sup>                                     | [172]     |
|                      | geraniol            | 25.2 <sup>1</sup>                                   | [168]     |
|                      | (±)-citronellal     | 31 <sup>1</sup>                                     | [172]     |
|                      | β-citronellol       | 31 <sup>1</sup>                                     | [172]     |
|                      | cinnamaldehyde      | 32 <sup>1</sup>                                     | [172]     |
|                      | γ-terpinene         | 34 <sup>1</sup>                                     | [172]     |
|                      | 4-allylanisole      | 35 <sup>1</sup>                                     | [172]     |
|                      | eugenol             | 40 <sup>1</sup>                                     | [172]     |
|                      | α-terpineol         | 43 <sup>1</sup>                                     | [172]     |
|                      | isoeugenol          | 44 <sup>1</sup>                                     | [172]     |
|                      | sabinene            | 45.1 <sup>1</sup>                                   | [168]     |
|                      | p-cymene            | 46 <sup>1</sup>                                     | [172]     |
|                      | terpinolene         | 52 <sup>1</sup>                                     | [172]     |
|                      | p-cymene            | 52.3 <sup>1</sup>                                   | [168]     |
|                      | α-phellandrene      | 54.6 <sup>1</sup>                                   | [168]     |
|                      | 1,8-cineole         | 56 <sup>1</sup>                                     | [172]     |
|                      | cinnamyl alcohol    | 61 <sup>1</sup>                                     | [172]     |
|                      | (-)-β-pinene        | 65 <sup>1</sup>                                     | [172]     |
|                      | (+)-camphor         | 71 <sup>1</sup>                                     | [172]     |
|                      | β-pinene            | 84.5 <sup>1</sup>                                   | [168]     |
|                      | linalool            | 85 <sup>1</sup>                                     | [172]     |
|                      | γ-terpinene         | 89 <sup>1</sup>                                     | [172]     |
|                      | myrcene             | 89 <sup>1</sup>                                     | [172]     |
|                      | α-pinene            | 97 <sup>1</sup>                                     | [172]     |
|                      | (R)-(+)-limonene    | 122 <sup>1</sup>                                    | [172]     |
|                      | α-pinene            | 123.5 <sup>1</sup>                                  | [168]     |
|                      | (-)-camphene        | >300 <sup>1</sup>                                   | [172]     |
|                      | trans-cinnamic acid | >300 <sup>1</sup>                                   | [172]     |
|                      | vanillin            | >300 <sup>1</sup>                                   | [172]     |
|                      | gallic acid         | >300 <sup>1</sup>                                   | [172]     |
|                      | (-)-borneol         | >300 <sup>1</sup>                                   | [172]     |
|                      | dimethyl sulfide    | >300 <sup>1</sup>                                   | [172]     |
| <i>S. litura</i>     | thymol              | 22 <sup>1</sup>                                     | [174]     |
|                      | carvacrol           | 38.3 <sup>1</sup>                                   | [166]     |
|                      | carvacrol           | 42.7 <sup>1</sup>                                   | [174]     |
|                      | anethole            | 62 <sup>1</sup>                                     | [174]     |
|                      | citronellal         | 110 <sup>1</sup>                                    | [174]     |
|                      | terpineol           | 141.3 <sup>1</sup>                                  | [174]     |
|                      | estragole           | 142.2 <sup>1</sup>                                  | [171]     |
|                      | eugenol             | 157.6 <sup>1</sup>                                  | [174]     |
|                      | linalool            | 178.6 <sup>1</sup>                                  | [171]     |

|                  |                         |                    |       |
|------------------|-------------------------|--------------------|-------|
|                  | limonene                | 395.6 <sup>1</sup> | [171] |
| <i>S. exigua</i> | $\alpha$ -thujone       | 37.1 <sup>2</sup>  | [110] |
|                  | $\alpha$ -caryophyllene | 40.4 <sup>2</sup>  | [110] |
|                  | p-cymene                | 50.7 <sup>2</sup>  | [110] |
|                  | (R)-(+)-limonene        | 67.2 <sup>2</sup>  | [110] |
|                  | 3-carene                | 77.4 <sup>2</sup>  | [110] |
|                  | (-)-bornyl acetate      | 82.6 <sup>2</sup>  | [110] |
|                  | $\beta$ -pinene         | 102.4 <sup>2</sup> | [110] |
|                  | 1,8-cineole             | 104.2 <sup>2</sup> | [110] |
|                  | borneol                 | 120 <sup>2</sup>   | [110] |
|                  | linalool                | 124.2 <sup>2</sup> | [110] |
|                  | $\beta$ -caryophyllene  | 134.8 <sup>2</sup> | [110] |
|                  | (+)-camphor             | 161.2 <sup>2</sup> | [110] |
|                  | camphene                | 194.6 <sup>2</sup> | [110] |

All values marked with an asterisk (\*) were recalculated for comparison.

<sup>1</sup>Determined at 24 hs.

<sup>2</sup>Determined at 48 hs.

<sup>a</sup>Commercial EOs. Plant species name not provided.
