# Supplementary material for: Can Essential Oils Be a Natural Alternative for the Control of Spodoptera frugiperda? A Review of Toxicity Methods and Their Modes of Action
Source: MDPI journal article supplement (doi:10.3390/plants12010003), 2022-12-20
Supplement: s1 [file s1]

## Supplementary Material S3

**Table S15** Main organic compounds of Essential oils used used as insecticides against *Spodoptera frugiperda*.

| Principal compound* of EOs                    | Occurence in the literature (%)** |
|-----------------------------------------------|-----------------------------------|
| geranial                                      | 11                                |
| linalool                                      | 9                                 |
| $\alpha$ -pinene                              | 9                                 |
| limoneno                                      | 5                                 |
| (E)-anetol                                    | 4                                 |
| citronelal                                    | 4                                 |
| $\beta$ -thujone                              | 4                                 |
| citronellol                                   | 4                                 |
| $\alpha$ -thujone                             | 4                                 |
| nonanone                                      | 4                                 |
| neral                                         | 4                                 |
| safrol                                        | 4                                 |
| acetophenone                                  | 4                                 |
| menthone                                      | 4                                 |
| 3-carene                                      | 4                                 |
| $\beta$ -bisabolol                            | 2                                 |
| methyl-chavicol                               | 2                                 |
| bicyclgermacrene                              | 2                                 |
| 1-butyl-3,4-methylenedioxybenzene             | 2                                 |
| zingiberene                                   | 2                                 |
| dillapiole                                    | 2                                 |
| precoceno                                     | 2                                 |
| $\beta$ -myrcene                              | 2                                 |
| carvona                                       | 2                                 |
| $\alpha$ -terpineol                           | 2                                 |
| $\delta$ -cadinene                            | 2                                 |
| 1-butyl-3,4-methylenedioxybenzene             | 2                                 |
| 2-methoxy-4,5- (methylenedioxy) Propiophenone | 2                                 |
| exalatacin                                    | 2                                 |
| (E)-caryophyllene                             | 2                                 |

\*Most abundant (quantity) compound in EO composition.

\*\*Percentages calculated based on the analysis of the composition of the 57 EO studied.
