# Supplementary material for: Can Essential Oils Be a Natural Alternative for the Control of Spodoptera frugiperda? A Review of Toxicity Methods and Their Modes of Action
Source: MDPI journal article supplement (doi:10.3390/plants12010003), 2022-12-20
Supplement: s1 [file s1]

## Supplementary Material S2

**Table S14** Results of the bibliographic search.

| Data base      | Date of search | Search results* | Discarded items | Reasons for discarding                                          |
|----------------|----------------|-----------------|-----------------|-----------------------------------------------------------------|
| Scopus         | 27/5/2022      | 22              | 6               | Don't use EOs.                                                  |
| Google Scholar | 11/7/2022      | 2200            | 2189            | Use only engineered compounds.<br>Work only with cell cultures. |
| Scielo         | 8/7/2022       | 3               | 2               | Determine other parameters and do not determine mortality.      |
| ScienceDirect  | 8/7/2022       | 137             | 132             | Are not research articles.                                      |
| Total          |                | 2362            |                 | Repeated items                                                  |

\*Construct used: "*Spodoptera frugiperda*" AND "essential oils" AND "toxicity"
